# Supplementary material for: Hollow carbon-based nanosystem for photoacoustic imaging-guided hydrogenothermal therapy in the second near-infrared window
Source: Royal Society of Chemistry journal article supplement (doi:10.1039/d1ra00093d), 2021-01-01
Supplement: d1ra00093d1.pdf [file d1ra00093d1.pdf]

## **Hollow Carbon-based Nanosystem for Photoacoustic Imaging-Guided Hydrogenothermal Therapy in the Second Near-Infrared Window**

Zhuo Jia <sup>a, #</sup>, Rong Dai <sup>a,b,c #</sup>, Ziliang Zheng <sup>b,c #</sup>, Yufei Qin <sup>b, c</sup>, Ailin Duan <sup>b, c</sup>, Xiaoyang Peng <sup>b, c</sup>, Xianmei Xie <sup>a, \*</sup> and Ruiping Zhang <sup>c, \*</sup>

<sup>a</sup> College of Chemistry and Chemical Engineering, Taiyuan University of Technology, Taiyuan 030024, China

<sup>b</sup> Department of Biochemistry and Molecular Biology, Shanxi Medical University, Taiyuan 030001, China

<sup>c</sup> Department of Radiology, Third Hospital of Shanxi Medical University, Taiyuan 030032, China

\* Corresponding author: [xxmsxty@sina.com](mailto:xxmsxty@sina.com)

\* Co-corresponding author: [zrp\\_7142@sxmu.edu.cn](mailto:zrp_7142@sxmu.edu.cn)

## Supporting Figures

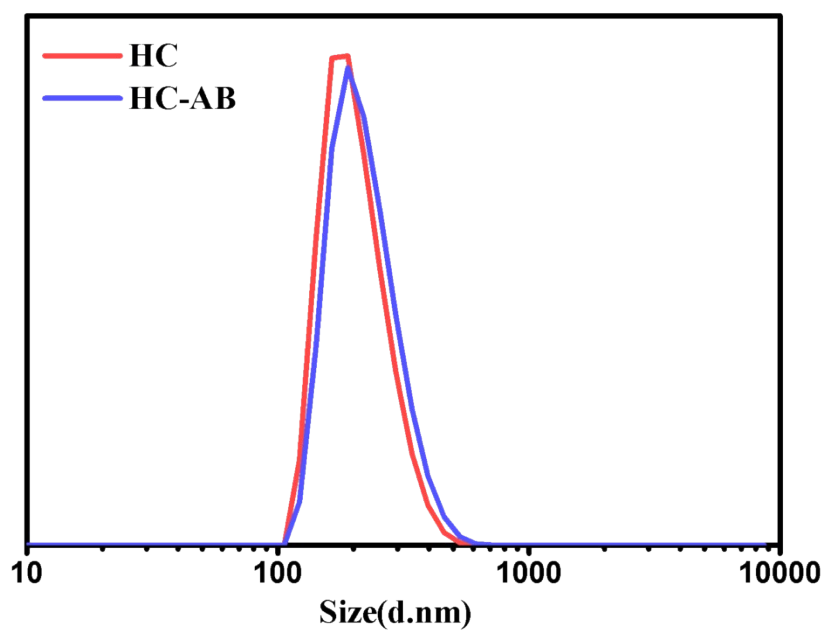

**Figure S1.** Particle size of HC and HC-AB.

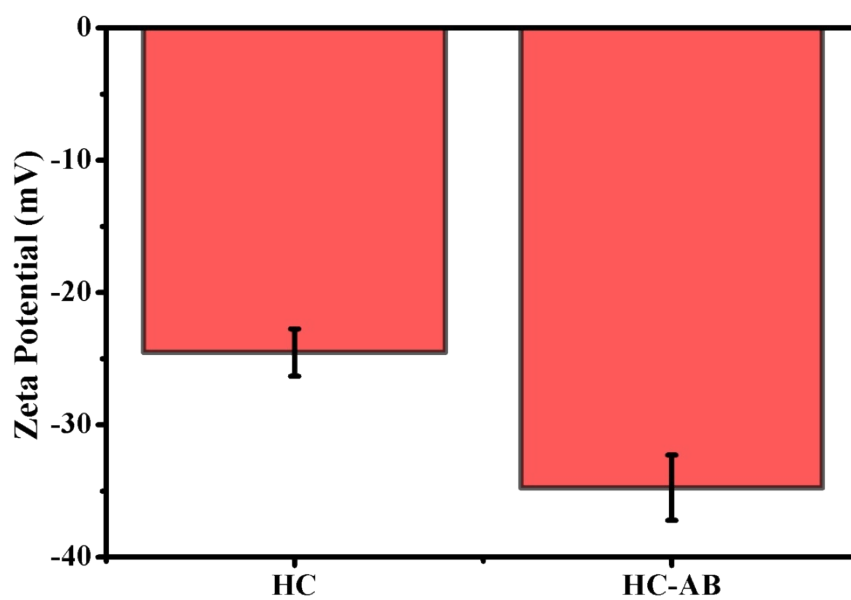

**Figure S2.** Zeta potential of HC and HC-AB.

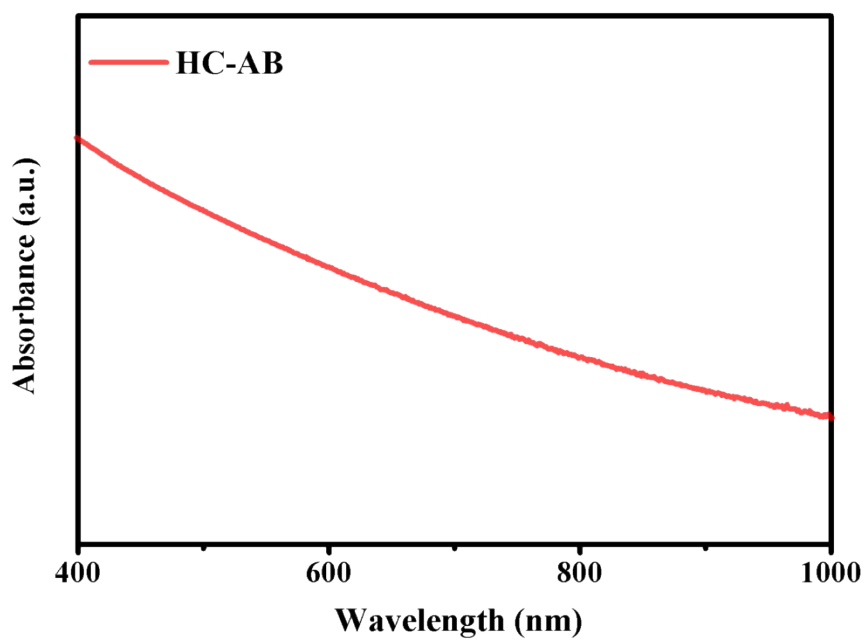

**Figure S3.** Adsorption spectrum of HC-AB in NIR-I.
